# Supplementary material
Source: PubMed Central journal article supplement (PMC7864881)
Supplement: NIHMS1653381-supplement-317883_Online.pdf [file NIHMS1653381-supplement-317883_Online.pdf]

# Supplemental Material

|                                                                                                                                                                            |      |
|----------------------------------------------------------------------------------------------------------------------------------------------------------------------------|------|
| Expanded Methods .....                                                                                                                                                     | iii  |
| Online Note I: Study populations.....                                                                                                                                      | iii  |
| The PREDIMED Study and the nested heart failure case-control study.....                                                                                                    | iii  |
| The EPIC-Potsdam cohort and the HF-replication sample .....                                                                                                                | iii  |
| Online Note II: Lipidomics - analytical chemistry and data preparation.....                                                                                                | iv   |
| Online Note III: Heart failure ascertainment.....                                                                                                                          | vi   |
| Online Note IV: Matching the lipids from PREDIMED to EPIC-Potsdam .....                                                                                                    | vi   |
| Online Tables .....                                                                                                                                                        | viii |
| Online Table I: Baseline-characteristics of the HF-cohort within the EPIC-Potsdam study .....                                                                              | viii |
| Online Table II: All single-lipid HF-associations in PREDIMED .....                                                                                                        | x    |
| Online Table III: Single lipid-HF associations for all lipids that were nominally significantly associated<br>with HF risk in PREDIMED and available in EPIC-Potsdam ..... | i    |
| Online Table IV: Single lipid-HF associations: additional adjustment for standard blood lipid markers...                                                                   | i    |
| Online Table V: Lipid clusters and heart failure incidence .....                                                                                                           | ii   |
| Online Table VI: Replication with the sum of all isomeric lipids in EPIC-Potsdam that match a<br>PREDIMED-hit .....                                                        | vi   |
| Online Table VII: Lipid score-HF associations: additional adjustment for standard blood lipid markers .                                                                    | ix   |
| Online Table VIII: Lipid marker-HF associations, stratified by intervention group .....                                                                                    | x    |

Online Figures .....xii

Online Figure I: Case-control design for HF in PREDIMED..... xii

Online Figure II: The robust lipidomics network..... xiii

## Expanded Methods

### Online Note I: Study populations

#### The PREDIMED Study and the nested heart failure case-control study

The PREDIMED trial was a multicenter randomized primary prevention study designed to assess the effect of the Mediterranean diet on cardiovascular disease (CVD) risk. Between 2003 and 2009, 7447 participants (3165 men, aged 55 to 80 years; 4282 women, aged 60 to 80 years) were recruited, without prior CVD but at high risk (either prevalent T2D or at least three of the following CVD-risk factors: current smoking, overweight/obesity, high LDL-cholesterol, low HDL-cholesterol, family history of early CAD, or hypertension). The present analysis used the PREDIMED-trial as an observational cohort, with an extended follow-up until December 31<sup>st</sup>, 2017. At study inception, 7403 participants were free of HF. In the study course, 362 incident HF cases were registered (Online Figure I), 331 with available blood samples. From this source population, we constructed a nested HF-case-control study, applying incidence density sampling. For each case, between 1 and 3 controls were randomly selected from all participants at risk at the date of HF-diagnosis, matched by recruitment center, year of birth ( $\pm$  5 years), and sex. The analytical sample comprised the 331 incident HF cases and 507 matched controls.

#### The EPIC-Potsdam cohort and the HF-replication sample

The prospective EPIC-Potsdam cohort study included 27,548 participants (16,644 women and 10,904 men), recruited between 1994 and 1998 from the general population within the age range of 35-65 years. During the follow-up period, participants were actively contacted every 2-3 years with response rates between 90% and 96% per follow-up round. Nested case-cohorts were constructed by drawing a representative, random sample (subcohort, n=1,262) from all participants who provided blood at baseline (n=26,437), and all incident CVD- and T2D-cases that occurred in the full cohort until case-specific censoring dates. The replication sample was based on nested case-cohorts for CVD and T2D,

including a random subsample (subcohort, n=1,262), all participants with incident type 2 diabetes (n = 820) and all participants with incident primary CVD (n = 583). Censoring dates were 31<sup>st</sup> of August 2005 for T2D, and 31<sup>st</sup> of November 2006 for CVD. Assuming the oversampling of future CVD and T2D cases fairly resembled the high cardiometabolic risk profile in PREDIMED, we analyzed all participants with available lipidomics profiles. After exclusion of participants with missing follow-up information or insufficient blood specimens or prevalent HF, the replication cohort comprised 2414 at-risk-participants, of whom 87 developed incident HF over the study course.

## Online Note II: Lipidomics - analytical chemistry and data preparation

The plasma polar and nonpolar lipids were profiled using a Nexera X2 U-HPLC system (Shimadzu Scientific Instruments; Marlborough, MA) coupled to an Exactive Plus orbitrap mass spectrometer (Thermo Fisher Scientific; Waltham, MA). Lipids were extracted from plasma (10  $\mu$ L) using 190  $\mu$ L of isopropanol containing 1,2-didodecanoyl-sn-glycero-3-phosphocholine as an internal standard (Avanti Polar Lipids; Alabaster, AL). After centrifugation (10 min, 9,000 x g, ambient temperature), supernatants (10  $\mu$ L) were injected directly onto a 100 x 2.1 mm ACQUITY BEH C8 column (1.7  $\mu$ m; Waters; Milford, MA). The column was eluted at a flow rate of 450  $\mu$ L/min isocratically for 1 minute at 80% mobile phase A (95:5:0.1 vol/vol/vol 10 mM ammonium acetate/methanol/acetic acid), followed by a linear gradient to 80% mobile-phase B (99.9:0.1 vol/vol methanol/acetic acid) over 2 minutes, a linear gradient to 100% mobile phase B over 7 minutes, and then 3 minutes at 100% mobile-phase B. MS analyses were carried out using electrospray ionization in the positive ion mode using full scan analysis over m/z 200-1100 at 70,000 resolution and 3 Hz data acquisition rate. Additional MS settings were ion spray voltage, 3.0 kV; capillary temperature, 300°C; probe heater temperature, 300 °C; sheath gas, 50; auxiliary gas, 15; and S-lens RF level 60. Raw data were processed using Progenesis Q1 software (NonLinear Dynamics) for feature alignment, nontargeted signal detection, and signal integration. Targeted processing of a subset

of lipids was conducted using TraceFinder software (version 3.2, Thermo Fisher Scientific; Waltham, MA).

Lipids are denoted by headgroup and total acyl carbon content and total acyl double bond content.

In PREDIMED, targeted processing of a subset of 216 known lipids was conducted using the TraceFinder software (version 3.2, Thermo Fisher Scientific; Waltham, MA), generating information on the lipid class and the total content of carbon atoms and double bonds across of all contained acyl chains. Therefore, lipids are reported at the level of lipid class, total acyl carbon content, and total double bond content.

Based on the assumption that missing values reflect true metabolite concentration under the limit of detection, we imputed missing data with half the minimal measured value, adding random noise unrelated to the case-status. Then, we applied inverse normal transformation, which produces a rank-based smooth normal distribution [mean=0, standard deviation (SD)=1].

In EPIC-Potsdam, per participant, 30 mL of venous blood was collected in a standardized procedure and subsequently fractioned and citrate plasma was stored in tanks of liquid nitrogen (approximately -196°C) or deep freezers (-80°C). The lipid profiling data was generated with Metabolon (Morrisville, US) using the Metabolon® Complex Lipid Panel. The platform generates the molecular species concentration and complete fatty acid composition of each covered lipid class. From plasma samples, lipids were extracted in methanol:dichloromethane, concentrated under nitrogen and reconstituted in ammonium acetate dichloromethane:methanol (50:50). The extracts were directly infused into the ionization source of a Sciex SelexION® -5500 QTRAP mass spectrometer. After ionization, the lipids passed through Selexion differential mobility spectrometry (DMS), in which voltages are applied that selectively allow the passage of only a specific lipid class at any given time. After the DMS filtering, lipids entered the Multiple Reaction Monitoring (MRM), where the lipid mass and its characteristic fragment were measured. The Metabolon® Complex Lipid Panel included more than 50 isotopically labeled internal standards, which were introduced in the biological sample early in the process and permitted accurate quantitation of lipids across and within classes.

In EPIC-Potsdam, measurements for 1043 distinct lipid species were retrieved. Like the data preparation

in PREDIMED, missing values were imputed below the lowest measured value, and inverse normal transformation was applied (see above). Lipids with >30% missing data were excluded.

### Online Note III: Heart failure ascertainment

In the PREDIMED trial, heart failure was a pre-specified secondary outcome (9). All HF events were assigned according to the 2005 (time of study design) guidelines on the diagnosis and treatment of acute and chronic HF of the European Society of Cardiology (10,11). At each recruitment center, incident HF cases were detected by study the physicians through review of the medical records of all participants and consultation of the National Death Index. Then, for the final adjudication of HF incidence, anonymized patient information was reviewed by the independent central Event Ascertainment Committee. For the present analysis, all HF cases up to December 31<sup>st</sup> 2017 –except for one recruitment center with available follow-up information until December 31<sup>st</sup> 2014– were included.

In EPIC-Potsdam, potential HF cases were identified by self-report, death certificates, and linkage to hospital records. Additionally, participants have been actively enquired for HF if they reported an incident myocardial infarction or usage of drugs typical for HF treatment. Potential cases were validated by the attending physicians using a standard validation form, including assessment of the exact date of diagnosis. Only participants with a physician-verified HF-diagnosis (I50 of International Classification of Diseases, 10th revision) after the recruitment were considered confirmed incident HF cases.

### Online Note IV: Matching the lipids from PREDIMED to EPIC-Potsdam

In PREDIMED, information on lipid metabolites was restricted to the sum of carbon atoms and double bonds across all acyl chains. In EPIC-Potsdam, metabolites with two FA-residues were resolved to the number of carbon atoms and double bonds within each acyl chain; TAG-measurements contained the sum of carbon atoms and double bonds across the three acyl chains and also the carbon atoms and

double bonds of the FA-residue in the sn-3 position. Therefore, matching was unambiguous for lipids with a single acyl chain (SLs, LPLs, MAGs, and CEs), but several measurements in EPIC-Potsdam potentially matched the PREDIMED measurements in classes with two or three acyl chains (two: PCs, PEs, DAGs, PEPLGs, and PCPLGs; three: TAGs). For replication of PREDIMED-findings, we selected all the isomers of a lipid metabolite in EPIC-Potsdam that had the same sum formula. Then, we summed all the absolute concentrations of these lipids in EPIC-Potsdam. We also ran models that simultaneously included all the matched isomers and selected the most significant predictors using a backwards procedure.

## Online Tables

Online Table I: Baseline-characteristics of the HF-cohort within the EPIC-Potsdam study

|                            | Full sample       | Non-incident HF   | Incident HF       |
|----------------------------|-------------------|-------------------|-------------------|
| n                          | 2414              | 2327              | 87                |
| Women                      | 1220 (50.5%)*     | 1156 (49.7%)      | 64 (73.6%)        |
| Age [years]                | 54 (45, 60)†      | 54 (45, 60)       | 59 (53, 62)       |
| BMI [kg/sqm]               | 27.0 (24.3, 30.2) | 27.0 (24.3, 30.2) | 27.8 (25.8, 31.1) |
| Highest education          |                   |                   |                   |
| Primary school             | 992 (41.1%)       | 959 (41.2%)       | 33 (37.9%)        |
| Sec./high school           | 573 (23.7%)       | 552 (23.7%)       | 21 (24.1%)        |
| College/higher             | 849 (35.2%)       | 816 (35.1%)       | 33 (37.9%)        |
| Smoker                     |                   |                   |                   |
| Never                      | 984 (40.8%)       | 966 (41.5%)       | 18 (20.7%)        |
| Former                     | 866 (35.9%)       | 835 (35.9%)       | 31 (35.6%)        |
| Current smoker (<20 U/day) | 368 (15.2%)       | 348 (15.0%)       | 20 (23.0%)        |
| Current smoker (≥20 U/day) | 196 (8.1%)        | 178 (7.6%)        | 18 (20.7%)        |
| Prevalent HT               | 1516 (62.8%)      | 1450 (62.3%)      | 66 (75.9%)        |
| Prevalent T2D              | 49 (2.0%)         | 44 (1.9%)         | 5 (5.7%)          |
| Follow-up time             | 8.4 (7.6, 9.2)    | 8.4 (7.6, 9.3)    | 5.9 (3.2, 7.4)    |
| Incident HF                | 87 (3.6%)         | 0 (0.0%)          | 87 (100.0%)       |
| First incident disease     |                   |                   |                   |
| T2D                        | 775 (32.1%)       | 758 (32.6%)       | 17 (19.5%)        |



|        |              |              |            |
|--------|--------------|--------------|------------|
| HF     | 50 (2.1%)    | 0 (0.0%)     | 50 (57.5%) |
| MI     | 250 (10.4%)  | 230 (9.9%)   | 20 (23.0%) |
| Stroke | 4 (0.2%)     | 4 (0.2%)     | 0 (0.0%)   |
| None   | 1335 (55.3%) | 1335 (57.4%) | 0 (0.0%)   |

Baseline-characteristics of the subsample for assessment of HF risk, nested within the EPIC-Potsdam cohort.

\*Number of observations (column percentage), all such values.

†Median (25<sup>th</sup>, 75<sup>th</sup>percentile), all such values.

Online Table II: All single-lipid HF-associations in PREDIMED

| lipid       | RR_M1             | p-val.  | Adj-P   | RR_M2             | p-val.  | FDR   |
|-------------|-------------------|---------|---------|-------------------|---------|-------|
| EA18:1      | 1.38 (1.21, 1.57) | 1.6E-06 | 3.6E-04 | 1.26 (1.09, 1.46) | 0.002   | 0.066 |
| PI38_4      | 0.82 (0.73, 0.93) | 0.001   | 0.122   | 0.79 (0.68, 0.91) | 0.001   | 0.056 |
| PC32_0      | 1.21 (1.07, 1.36) | 0.002   | 0.122   | 1.23 (1.08, 1.41) | 0.002   | 0.066 |
| CER16:0     | 1.2 (1.07, 1.34)  | 0.002   | 0.122   | 1.28 (1.13, 1.47) | 1.7E-04 | 0.036 |
| DAG36_0     | 0.83 (0.73, 0.94) | 0.004   | 0.153   | 0.81 (0.71, 0.93) | 0.003   | 0.08  |
| Q10         | 0.84 (0.74, 0.95) | 0.004   | 0.153   | 0.83 (0.72, 0.95) | 0.006   | 0.11  |
| DAG34_0     | 0.84 (0.73, 0.95) | 0.007   | 0.219   | 0.76 (0.65, 0.88) | 3.3E-04 | 0.036 |
| DAG34_2     | 1.16 (1.04, 1.31) | 0.009   | 0.232   | 1.05 (0.93, 1.2)  | 0.42    | 0.858 |
| PC40_10     | 0.86 (0.76, 0.97) | 0.011   | 0.232   | 0.94 (0.82, 1.07) | 0.335   | 0.804 |
| PIPERINE    | 1.19 (1.04, 1.35) | 0.011   | 0.232   | 1.09 (0.94, 1.27) | 0.228   | 0.721 |
| TAG51_1     | 1.15 (1.03, 1.29) | 0.012   | 0.232   | 1.03 (0.9, 1.17)  | 0.671   | 0.937 |
| SPHINGOSINE | 1.17 (1.03, 1.32) | 0.013   | 0.232   | 1.14 (1, 1.31)    | 0.053   | 0.395 |
| PC-PLGA36_5 | 0.86 (0.77, 0.97) | 0.015   | 0.246   | 0.91 (0.81, 1.04) | 0.188   | 0.655 |
| PS34_0      | 0.87 (0.77, 0.97) | 0.017   | 0.251   | 0.91 (0.81, 1.04) | 0.17    | 0.642 |
| DAG34_3     | 1.15 (1.03, 1.3)  | 0.017   | 0.251   | 1.04 (0.91, 1.19) | 0.52    | 0.906 |
| PC40_6      | 0.87 (0.78, 0.98) | 0.02    | 0.275   | 0.9 (0.78, 1.02)  | 0.09    | 0.439 |
| EA16:1      | 1.16 (1.02, 1.32) | 0.023   | 0.281   | 1.11 (0.96, 1.27) | 0.156   | 0.637 |
| CE22:5      | 0.88 (0.79, 0.98) | 0.023   | 0.281   | 0.98 (0.87, 1.11) | 0.79    | 0.944 |
| TAG50_0     | 1.13 (1.01, 1.26) | 0.026   | 0.299   | 1.01 (0.89, 1.15) | 0.839   | 0.979 |
| PE34_2      | 1.13 (1.01, 1.27) | 0.031   | 0.34    | 1.07 (0.95, 1.22) | 0.261   | 0.752 |
| PC40_9      | 0.88 (0.78, 0.99) | 0.034   | 0.349   | 0.95 (0.84, 1.09) | 0.489   | 0.873 |

|         |                   |       |       |                   |       |       |
|---------|-------------------|-------|-------|-------------------|-------|-------|
| SM16:1  | 1.15 (1.01, 1.32) | 0.041 | 0.385 | 1.3 (1.1, 1.54)   | 0.002 | 0.066 |
| DAG34_1 | 1.13 (1, 1.26)    | 0.041 | 0.385 | 1.01 (0.89, 1.15) | 0.89  | 0.979 |
| DAG36_4 | 1.13 (1, 1.26)    | 0.043 | 0.391 | 1.11 (0.98, 1.25) | 0.118 | 0.51  |
| TAG52_4 | 1.12 (1, 1.25)    | 0.046 | 0.392 | 1.09 (0.97, 1.23) | 0.164 | 0.642 |
| TAG54_3 | 0.9 (0.8, 1)      | 0.047 | 0.392 | 0.9 (0.8, 1.02)   | 0.091 | 0.439 |
| CE20:4  | 0.9 (0.8, 1)      | 0.05  | 0.401 | 0.95 (0.84, 1.07) | 0.393 | 0.858 |
| OH36_4  | 1.15 (1, 1.32)    | 0.052 | 0.401 | 1.19 (1.01, 1.4)  | 0.038 | 0.34  |
| TAG50_1 | 1.12 (1, 1.24)    | 0.057 | 0.405 | 0.98 (0.86, 1.11) | 0.725 | 0.937 |
| TAG48_0 | 1.11 (1, 1.23)    | 0.061 | 0.405 | 0.99 (0.87, 1.12) | 0.887 | 0.979 |
| CE22:6  | 0.9 (0.8, 1.01)   | 0.063 | 0.405 | 1 (0.88, 1.14)    | 0.966 | 0.984 |
| PC36_1  | 0.9 (0.79, 1.01)  | 0.064 | 0.405 | 0.9 (0.78, 1.04)  | 0.149 | 0.621 |
| TAG56_3 | 0.9 (0.81, 1.01)  | 0.065 | 0.405 | 0.89 (0.79, 1)    | 0.041 | 0.354 |
| DAG32_0 | 0.88 (0.76, 1.01) | 0.066 | 0.405 | 0.83 (0.7, 0.97)  | 0.021 | 0.267 |
| DAG32_1 | 1.12 (0.99, 1.25) | 0.069 | 0.405 | 0.98 (0.86, 1.12) | 0.79  | 0.944 |
| TAG58_8 | 0.9 (0.79, 1.01)  | 0.071 | 0.405 | 0.91 (0.8, 1.04)  | 0.179 | 0.642 |
| LPE16:0 | 1.12 (0.99, 1.25) | 0.073 | 0.405 | 1.17 (1.02, 1.34) | 0.024 | 0.267 |
| LPE18:2 | 1.11 (0.99, 1.24) | 0.075 | 0.405 | 1.2 (1.05, 1.37)  | 0.008 | 0.133 |
| PC38_4  | 0.9 (0.8, 1.01)   | 0.077 | 0.405 | 0.89 (0.78, 1.01) | 0.07  | 0.4   |
| SM14:0  | 1.11 (0.99, 1.24) | 0.077 | 0.405 | 1.16 (1.02, 1.32) | 0.026 | 0.267 |
| PC34_2  | 1.11 (0.99, 1.24) | 0.079 | 0.405 | 1.13 (0.99, 1.28) | 0.064 | 0.4   |
| PC38_6  | 0.9 (0.8, 1.01)   | 0.08  | 0.405 | 0.97 (0.85, 1.1)  | 0.614 | 0.928 |
| DAG30_0 | 1.11 (0.99, 1.24) | 0.081 | 0.405 | 1.01 (0.88, 1.16) | 0.871 | 0.979 |
| TAG58_7 | 0.9 (0.8, 1.01)   | 0.083 | 0.406 | 0.89 (0.78, 1.01) | 0.07  | 0.4   |
| PE36_0  | 1.11 (0.99, 1.25) | 0.086 | 0.413 | 1.09 (0.96, 1.24) | 0.176 | 0.642 |

|            |                   |       |       |                   |       |       |
|------------|-------------------|-------|-------|-------------------|-------|-------|
| PE36_3     | 1.11 (0.99, 1.23) | 0.088 | 0.413 | 1.09 (0.96, 1.24) | 0.175 | 0.642 |
| LPC16:1    | 1.11 (0.98, 1.24) | 0.091 | 0.419 | 1.09 (0.95, 1.26) | 0.193 | 0.656 |
| PE-PLG34_3 | 1.09 (0.98, 1.22) | 0.095 | 0.421 | 1.11 (0.98, 1.25) | 0.106 | 0.489 |
| SM24:0     | 0.9 (0.81, 1.02)  | 0.095 | 0.421 | 0.94 (0.82, 1.09) | 0.427 | 0.858 |
| TAG52_1    | 1.09 (0.98, 1.23) | 0.098 | 0.422 | 0.97 (0.85, 1.11) | 0.675 | 0.937 |
| PC-PLG36_2 | 0.91 (0.82, 1.02) | 0.105 | 0.447 | 1.03 (0.9, 1.17)  | 0.694 | 0.937 |
| DAG36_1    | 0.9 (0.81, 1.02)  | 0.109 | 0.449 | 0.79 (0.69, 0.9)  | 0.001 | 0.036 |
| LPC16:0    | 1.11 (0.98, 1.25) | 0.11  | 0.449 | 1.19 (1.02, 1.38) | 0.024 | 0.267 |
| PC38_2     | 0.9 (0.8, 1.02)   | 0.114 | 0.455 | 0.91 (0.79, 1.06) | 0.23  | 0.721 |
| TAG51_0    | 1.09 (0.98, 1.23) | 0.118 | 0.463 | 1.01 (0.88, 1.15) | 0.906 | 0.979 |
| PE-PLG40_7 | 0.9 (0.81, 1.03)  | 0.12  | 0.463 | 0.96 (0.84, 1.1)  | 0.582 | 0.922 |
| PE36_4     | 1.09 (0.97, 1.23) | 0.125 | 0.467 | 1.02 (0.9, 1.16)  | 0.741 | 0.937 |
| CER22:0    | 1.09 (0.98, 1.23) | 0.125 | 0.467 | 1.11 (0.97, 1.26) | 0.12  | 0.51  |
| DAG32_2    | 1.09 (0.97, 1.22) | 0.132 | 0.472 | 1 (0.88, 1.14)    | 0.985 | 0.985 |
| DAG36_3    | 1.09 (0.97, 1.22) | 0.139 | 0.472 | 1.06 (0.94, 1.2)  | 0.329 | 0.804 |
| CE20:5     | 0.91 (0.81, 1.03) | 0.141 | 0.472 | 1 (0.87, 1.14)    | 0.958 | 0.984 |
| MAG16:1    | 0.9 (0.78, 1.04)  | 0.144 | 0.472 | 0.83 (0.7, 0.98)  | 0.024 | 0.267 |
| LPE22:6    | 1.08 (0.97, 1.22) | 0.145 | 0.472 | 1.13 (0.99, 1.28) | 0.069 | 0.4   |
| TAG54_1    | 1.08 (0.97, 1.21) | 0.15  | 0.472 | 0.97 (0.86, 1.11) | 0.686 | 0.937 |
| TAG49_0    | 1.08 (0.97, 1.21) | 0.152 | 0.472 | 0.99 (0.87, 1.13) | 0.897 | 0.979 |
| PE34_0     | 1.08 (0.97, 1.22) | 0.153 | 0.472 | 1.09 (0.96, 1.24) | 0.18  | 0.642 |
| SM18:2     | 1.11 (0.96, 1.26) | 0.155 | 0.472 | 1.26 (1.06, 1.49) | 0.008 | 0.133 |
| PC38_3     | 0.91 (0.82, 1.03) | 0.157 | 0.472 | 0.85 (0.74, 0.97) | 0.019 | 0.267 |
| PC-PLG40_7 | 0.91 (0.81, 1.03) | 0.157 | 0.472 | 0.99 (0.87, 1.14) | 0.916 | 0.98  |

|            |                   |       |       |                   |       |       |
|------------|-------------------|-------|-------|-------------------|-------|-------|
| PE38_6     | 1.08 (0.97, 1.22) | 0.157 | 0.472 | 1.04 (0.93, 1.18) | 0.477 | 0.873 |
| CE16:1     | 1.08 (0.97, 1.2)  | 0.157 | 0.472 | 1.02 (0.91, 1.15) | 0.732 | 0.937 |
| SM16:0     | 1.08 (0.97, 1.22) | 0.159 | 0.472 | 1.28 (1.11, 1.49) | 0.001 | 0.036 |
| TAG50_2    | 1.08 (0.97, 1.21) | 0.159 | 0.472 | 0.95 (0.84, 1.09) | 0.495 | 0.873 |
| TAG52_5    | 1.08 (0.97, 1.21) | 0.164 | 0.479 | 1.05 (0.93, 1.19) | 0.448 | 0.873 |
| LPE20:4    | 1.08 (0.96, 1.22) | 0.173 | 0.498 | 1.13 (0.98, 1.3)  | 0.09  | 0.439 |
| TAG56_2    | 0.92 (0.83, 1.03) | 0.176 | 0.499 | 0.86 (0.76, 0.97) | 0.017 | 0.257 |
| LPC18:2    | 1.07 (0.97, 1.2)  | 0.183 | 0.505 | 1.22 (1.06, 1.39) | 0.005 | 0.11  |
| PC34_0     | 1.08 (0.96, 1.21) | 0.184 | 0.505 | 1.14 (1, 1.29)    | 0.045 | 0.363 |
| TAG46_3    | 1.08 (0.96, 1.22) | 0.185 | 0.505 | 1.02 (0.89, 1.17) | 0.769 | 0.944 |
| PE36_2     | 1.08 (0.96, 1.21) | 0.188 | 0.508 | 1.02 (0.9, 1.16)  | 0.719 | 0.937 |
| LPC14:0    | 1.08 (0.96, 1.22) | 0.21  | 0.555 | 1.04 (0.9, 1.19)  | 0.591 | 0.922 |
| LPC20:4    | 1.07 (0.96, 1.2)  | 0.211 | 0.555 | 1.12 (0.97, 1.28) | 0.11  | 0.497 |
| PE-PLG36_4 | 1.07 (0.96, 1.19) | 0.217 | 0.566 | 1.12 (0.98, 1.26) | 0.091 | 0.439 |
| SM18:0     | 1.07 (0.96, 1.21) | 0.228 | 0.586 | 1.15 (1, 1.32)    | 0.045 | 0.363 |
| TAG56_5    | 1.07 (0.96, 1.21) | 0.233 | 0.592 | 1.02 (0.9, 1.16)  | 0.713 | 0.937 |
| TAG44_2    | 1.07 (0.95, 1.2)  | 0.239 | 0.6   | 1.01 (0.88, 1.16) | 0.877 | 0.979 |
| PE-PLG34_2 | 1.06 (0.96, 1.19) | 0.243 | 0.603 | 1.12 (0.99, 1.26) | 0.069 | 0.4   |
| TAG50_3    | 1.07 (0.95, 1.2)  | 0.246 | 0.604 | 0.96 (0.84, 1.1)  | 0.561 | 0.918 |
| PC30_0     | 1.07 (0.96, 1.19) | 0.249 | 0.604 | 1.02 (0.9, 1.17)  | 0.709 | 0.937 |
| PE-PLG36_1 | 1.06 (0.96, 1.19) | 0.254 | 0.609 | 1.08 (0.96, 1.21) | 0.181 | 0.642 |
| TAG46_2    | 1.07 (0.95, 1.2)  | 0.258 | 0.609 | 0.99 (0.86, 1.13) | 0.874 | 0.979 |
| PC34_1     | 0.93 (0.83, 1.05) | 0.262 | 0.609 | 0.95 (0.83, 1.08) | 0.429 | 0.858 |
| PE-PLG36_3 | 1.07 (0.95, 1.2)  | 0.262 | 0.609 | 1.13 (1, 1.28)    | 0.053 | 0.395 |

|            |                   |       |       |                   |       |       |
|------------|-------------------|-------|-------|-------------------|-------|-------|
| PC-PLG34_2 | 0.94 (0.84, 1.05) | 0.267 | 0.61  | 1.04 (0.92, 1.19) | 0.497 | 0.873 |
| LPC18:3    | 1.07 (0.95, 1.21) | 0.272 | 0.61  | 1.15 (0.99, 1.33) | 0.064 | 0.4   |
| LPE18:0    | 1.07 (0.95, 1.21) | 0.274 | 0.61  | 1.12 (0.97, 1.29) | 0.114 | 0.503 |
| TAG47_0    | 1.06 (0.95, 1.19) | 0.274 | 0.61  | 0.98 (0.86, 1.11) | 0.723 | 0.937 |
| SM18:1     | 1.07 (0.94, 1.22) | 0.279 | 0.616 | 1.2 (1.02, 1.4)   | 0.032 | 0.313 |
| CE20:3     | 0.94 (0.84, 1.05) | 0.295 | 0.641 | 0.93 (0.82, 1.06) | 0.27  | 0.752 |
| TAG56_7    | 0.94 (0.83, 1.06) | 0.297 | 0.641 | 0.95 (0.84, 1.08) | 0.427 | 0.858 |
| TAG49_2    | 1.06 (0.95, 1.18) | 0.302 | 0.641 | 0.97 (0.85, 1.1)  | 0.642 | 0.937 |
| TAG48_2    | 1.06 (0.95, 1.19) | 0.303 | 0.641 | 0.94 (0.83, 1.08) | 0.4   | 0.858 |
| TAG44_1    | 1.06 (0.95, 1.19) | 0.31  | 0.65  | 0.99 (0.87, 1.14) | 0.915 | 0.98  |
| PE32_0     | 1.06 (0.95, 1.18) | 0.313 | 0.65  | 1.05 (0.92, 1.19) | 0.478 | 0.873 |
| SM24:1     | 0.94 (0.84, 1.06) | 0.321 | 0.661 | 1.06 (0.92, 1.23) | 0.386 | 0.851 |
| TAG50_4    | 1.06 (0.94, 1.19) | 0.327 | 0.667 | 0.99 (0.87, 1.13) | 0.895 | 0.979 |
| TAG45_2    | 1.05 (0.95, 1.18) | 0.339 | 0.685 | 0.98 (0.86, 1.11) | 0.737 | 0.937 |
| TAG46_4    | 1.06 (0.94, 1.19) | 0.349 | 0.694 | 1.02 (0.89, 1.16) | 0.81  | 0.961 |
| TAG48_3    | 1.06 (0.94, 1.19) | 0.35  | 0.694 | 0.97 (0.85, 1.11) | 0.676 | 0.937 |
| TAG49_1    | 1.05 (0.94, 1.17) | 0.362 | 0.707 | 0.97 (0.85, 1.1)  | 0.609 | 0.928 |
| PC-PLG34_4 | 0.95 (0.85, 1.06) | 0.364 | 0.707 | 0.97 (0.86, 1.1)  | 0.627 | 0.934 |
| TAG52_0    | 1.05 (0.94, 1.18) | 0.369 | 0.707 | 0.95 (0.83, 1.09) | 0.458 | 0.873 |
| TAG46_1    | 1.05 (0.94, 1.18) | 0.37  | 0.707 | 0.95 (0.83, 1.09) | 0.48  | 0.873 |
| PC-PLG38_7 | 0.95 (0.85, 1.07) | 0.384 | 0.725 | 0.97 (0.86, 1.1)  | 0.649 | 0.937 |
| TAG48_4    | 1.05 (0.94, 1.19) | 0.386 | 0.725 | 1 (0.87, 1.14)    | 0.971 | 0.984 |
| TAG43_0    | 1.05 (0.94, 1.18) | 0.389 | 0.725 | 1.01 (0.89, 1.16) | 0.857 | 0.979 |
| PC32_2     | 1.05 (0.93, 1.19) | 0.394 | 0.728 | 1.03 (0.9, 1.17)  | 0.693 | 0.937 |

|             |                   |       |       |                   |       |       |
|-------------|-------------------|-------|-------|-------------------|-------|-------|
| TAG45_3     | 1.05 (0.94, 1.18) | 0.399 | 0.73  | 0.97 (0.85, 1.11) | 0.687 | 0.937 |
| CE18:0      | 0.95 (0.86, 1.07) | 0.419 | 0.761 | 1.01 (0.9, 1.15)  | 0.817 | 0.964 |
| TAG51_3     | 1.05 (0.94, 1.17) | 0.424 | 0.763 | 0.99 (0.88, 1.13) | 0.922 | 0.981 |
| TAG54_5     | 1.05 (0.93, 1.18) | 0.431 | 0.769 | 0.97 (0.85, 1.11) | 0.676 | 0.937 |
| LPC18:0     | 1.05 (0.93, 1.18) | 0.442 | 0.769 | 1.15 (0.99, 1.33) | 0.063 | 0.4   |
| PE40_6      | 0.96 (0.85, 1.07) | 0.442 | 0.769 | 0.93 (0.82, 1.06) | 0.273 | 0.752 |
| TAG41_0     | 1.05 (0.93, 1.18) | 0.446 | 0.769 | 1.04 (0.91, 1.2)  | 0.555 | 0.918 |
| TAG54_4     | 0.96 (0.86, 1.07) | 0.447 | 0.769 | 1 (0.89, 1.13)    | 0.942 | 0.984 |
| TAG58_9     | 0.95 (0.85, 1.08) | 0.451 | 0.769 | 1 (0.88, 1.14)    | 0.979 | 0.984 |
| TAG48_1     | 1.04 (0.93, 1.16) | 0.452 | 0.769 | 0.92 (0.81, 1.06) | 0.26  | 0.752 |
| LPC20:5     | 1.04 (0.93, 1.16) | 0.461 | 0.771 | 1.16 (1.02, 1.33) | 0.026 | 0.267 |
| LPC22:6     | 1.04 (0.93, 1.16) | 0.464 | 0.771 | 1.12 (0.99, 1.28) | 0.083 | 0.439 |
| TAG54_10    | 0.96 (0.85, 1.08) | 0.464 | 0.771 | 1 (0.87, 1.15)    | 0.975 | 0.984 |
| PC36_0      | 0.96 (0.86, 1.07) | 0.476 | 0.772 | 1.05 (0.92, 1.2)  | 0.451 | 0.873 |
| TAG54_6     | 1.04 (0.93, 1.16) | 0.48  | 0.772 | 1.07 (0.95, 1.21) | 0.259 | 0.752 |
| PC-PLG34_1  | 0.96 (0.85, 1.08) | 0.481 | 0.772 | 1.08 (0.94, 1.24) | 0.275 | 0.752 |
| PE-PLG38_7  | 0.96 (0.85, 1.08) | 0.482 | 0.772 | 1 (0.88, 1.14)    | 0.95  | 0.984 |
| DAG38_5     | 1.04 (0.93, 1.18) | 0.483 | 0.772 | 0.96 (0.85, 1.1)  | 0.591 | 0.922 |
| PC-PLG38_6  | 0.96 (0.85, 1.08) | 0.49  | 0.776 | 0.97 (0.85, 1.11) | 0.657 | 0.937 |
| TAG47_2     | 1.04 (0.93, 1.16) | 0.492 | 0.776 | 0.95 (0.83, 1.08) | 0.418 | 0.858 |
| TAG49_3     | 1.04 (0.93, 1.16) | 0.498 | 0.779 | 0.93 (0.82, 1.06) | 0.273 | 0.752 |
| PC36_2      | 0.96 (0.86, 1.08) | 0.515 | 0.8   | 1 (0.88, 1.14)    | 0.975 | 0.984 |
| CAMPESTEROL | 0.96 (0.86, 1.08) | 0.528 | 0.815 | 1.04 (0.91, 1.2)  | 0.554 | 0.918 |
| TAG58_11    | 0.96 (0.86, 1.08) | 0.539 | 0.821 | 0.97 (0.86, 1.09) | 0.582 | 0.922 |

|            |                   |       |       |                   |       |       |
|------------|-------------------|-------|-------|-------------------|-------|-------|
| TAG46_0    | 1.03 (0.93, 1.15) | 0.543 | 0.821 | 0.93 (0.83, 1.06) | 0.302 | 0.787 |
| PC-PLG36_3 | 0.96 (0.86, 1.08) | 0.544 | 0.821 | 1.06 (0.94, 1.21) | 0.338 | 0.804 |
| LPE22:0    | 0.97 (0.87, 1.08) | 0.574 | 0.859 | 1.15 (1, 1.31)    | 0.055 | 0.395 |
| PC36_4     | 1.03 (0.92, 1.15) | 0.579 | 0.859 | 1.13 (0.99, 1.29) | 0.073 | 0.405 |
| PC-PLG36_1 | 0.97 (0.87, 1.08) | 0.581 | 0.859 | 1.06 (0.94, 1.2)  | 0.337 | 0.804 |
| TAG54_2    | 0.97 (0.87, 1.08) | 0.585 | 0.859 | 0.9 (0.79, 1.02)  | 0.091 | 0.439 |
| TAG53_3    | 0.97 (0.87, 1.08) | 0.591 | 0.863 | 0.97 (0.86, 1.09) | 0.584 | 0.922 |
| TAG51_2    | 1.03 (0.92, 1.15) | 0.6   | 0.864 | 0.94 (0.82, 1.07) | 0.346 | 0.808 |
| TAG50_5    | 1.03 (0.92, 1.16) | 0.602 | 0.864 | 0.98 (0.86, 1.11) | 0.718 | 0.937 |
| TAG43_1    | 1.03 (0.92, 1.15) | 0.609 | 0.864 | 0.96 (0.84, 1.1)  | 0.596 | 0.922 |
| TAG60_12   | 0.97 (0.86, 1.09) | 0.615 | 0.864 | 0.97 (0.86, 1.09) | 0.597 | 0.922 |
| TAG48_5    | 1.03 (0.91, 1.16) | 0.619 | 0.864 | 0.99 (0.87, 1.13) | 0.853 | 0.979 |
| TAG56_10   | 0.97 (0.87, 1.09) | 0.619 | 0.864 | 0.97 (0.86, 1.09) | 0.619 | 0.928 |
| TAG56_4    | 0.97 (0.87, 1.09) | 0.625 | 0.864 | 0.97 (0.86, 1.09) | 0.577 | 0.922 |
| TAG56_8    | 1.03 (0.92, 1.16) | 0.631 | 0.864 | 1.03 (0.91, 1.16) | 0.672 | 0.937 |
| TAG47_1    | 1.03 (0.92, 1.14) | 0.642 | 0.864 | 0.94 (0.82, 1.07) | 0.348 | 0.808 |
| PC32_1     | 1.03 (0.92, 1.15) | 0.651 | 0.864 | 0.95 (0.84, 1.08) | 0.42  | 0.858 |
| PE38_4     | 1.03 (0.91, 1.16) | 0.658 | 0.864 | 0.96 (0.84, 1.1)  | 0.557 | 0.918 |
| SM20:0     | 0.97 (0.86, 1.1)  | 0.658 | 0.864 | 1.08 (0.94, 1.25) | 0.282 | 0.76  |
| TAG43_2    | 1.03 (0.92, 1.15) | 0.659 | 0.864 | 0.95 (0.83, 1.08) | 0.421 | 0.858 |
| PC36_3     | 0.97 (0.86, 1.1)  | 0.66  | 0.864 | 0.98 (0.85, 1.13) | 0.78  | 0.944 |
| PE38_2     | 0.98 (0.87, 1.09) | 0.66  | 0.864 | 1.06 (0.94, 1.2)  | 0.338 | 0.804 |
| PC34_4     | 0.97 (0.86, 1.1)  | 0.663 | 0.864 | 0.94 (0.82, 1.08) | 0.413 | 0.858 |
| PE-PLG38_5 | 0.97 (0.87, 1.1)  | 0.669 | 0.864 | 0.98 (0.86, 1.11) | 0.728 | 0.937 |



|             |                   |       |       |                   |       |       |
|-------------|-------------------|-------|-------|-------------------|-------|-------|
| PC-PLGB36_5 | 1.02 (0.92, 1.15) | 0.673 | 0.864 | 1.01 (0.89, 1.14) | 0.904 | 0.979 |
| TAG54_8     | 0.98 (0.87, 1.09) | 0.68  | 0.864 | 0.97 (0.86, 1.1)  | 0.654 | 0.937 |
| CE18:1      | 0.98 (0.87, 1.09) | 0.681 | 0.864 | 1.09 (0.96, 1.24) | 0.178 | 0.642 |
| TAG42_0     | 1.02 (0.91, 1.15) | 0.685 | 0.864 | 0.98 (0.86, 1.12) | 0.767 | 0.944 |
| TAG52_3     | 1.02 (0.91, 1.15) | 0.685 | 0.864 | 0.96 (0.85, 1.09) | 0.554 | 0.918 |
| SM22:0      | 0.98 (0.87, 1.1)  | 0.687 | 0.864 | 1.03 (0.89, 1.18) | 0.702 | 0.937 |
| CHOLESTEROL | 0.98 (0.87, 1.1)  | 0.688 | 0.864 | 1.05 (0.92, 1.21) | 0.457 | 0.873 |
| TAG52_2     | 1.02 (0.91, 1.15) | 0.696 | 0.869 | 0.93 (0.82, 1.06) | 0.285 | 0.76  |
| TAG44_0     | 1.02 (0.92, 1.14) | 0.7   | 0.869 | 0.94 (0.83, 1.07) | 0.366 | 0.831 |
| TAG52_6     | 1.02 (0.91, 1.15) | 0.718 | 0.878 | 0.99 (0.88, 1.11) | 0.85  | 0.979 |
| CE16:0      | 1.02 (0.91, 1.14) | 0.72  | 0.878 | 1.15 (1.01, 1.31) | 0.033 | 0.313 |
| PE-PLG38_6  | 0.98 (0.87, 1.1)  | 0.722 | 0.878 | 1.02 (0.9, 1.16)  | 0.707 | 0.937 |
| CER24:0     | 1.02 (0.91, 1.14) | 0.726 | 0.878 | 1.04 (0.92, 1.18) | 0.528 | 0.909 |
| CE18:2      | 0.98 (0.88, 1.1)  | 0.732 | 0.878 | 1.08 (0.96, 1.23) | 0.207 | 0.679 |
| TAG55_3     | 0.98 (0.88, 1.09) | 0.732 | 0.878 | 1 (0.89, 1.12)    | 0.971 | 0.984 |
| DAG36_2     | 0.98 (0.88, 1.1)  | 0.747 | 0.891 | 0.93 (0.82, 1.05) | 0.237 | 0.725 |
| TAG56_9     | 0.98 (0.88, 1.1)  | 0.754 | 0.894 | 0.99 (0.88, 1.11) | 0.848 | 0.979 |
| TAG50_6     | 1.02 (0.9, 1.15)  | 0.762 | 0.894 | 0.98 (0.86, 1.12) | 0.78  | 0.944 |
| TAG45_1     | 1.02 (0.91, 1.13) | 0.763 | 0.894 | 0.94 (0.83, 1.07) | 0.377 | 0.84  |
| TAG54_7     | 1.02 (0.91, 1.14) | 0.766 | 0.894 | 1.01 (0.9, 1.13)  | 0.875 | 0.979 |
| LPE20:0     | 1.02 (0.91, 1.14) | 0.774 | 0.899 | 1.09 (0.96, 1.25) | 0.194 | 0.656 |
| TAG54_9     | 0.98 (0.88, 1.11) | 0.783 | 0.905 | 0.98 (0.87, 1.11) | 0.788 | 0.944 |
| CE18:3      | 0.99 (0.88, 1.1)  | 0.792 | 0.908 | 1 (0.88, 1.13)    | 0.944 | 0.984 |
| PE36_1      | 0.99 (0.88, 1.1)  | 0.799 | 0.908 | 0.92 (0.81, 1.05) | 0.238 | 0.725 |

|             |                   |       |       |                   |       |       |
|-------------|-------------------|-------|-------|-------------------|-------|-------|
| PE-PLG36_5  | 1.01 (0.91, 1.14) | 0.801 | 0.908 | 1 (0.88, 1.13)    | 0.964 | 0.984 |
| LPC18:1     | 1.01 (0.91, 1.13) | 0.803 | 0.908 | 1.14 (0.99, 1.3)  | 0.066 | 0.4   |
| PC-PLG34_3  | 0.99 (0.89, 1.1)  | 0.81  | 0.911 | 1.04 (0.92, 1.18) | 0.489 | 0.873 |
| TAG58_6     | 1.01 (0.9, 1.14)  | 0.816 | 0.912 | 0.96 (0.85, 1.08) | 0.481 | 0.873 |
| PE-PLG42_11 | 0.99 (0.87, 1.11) | 0.819 | 0.912 | 1.06 (0.93, 1.23) | 0.369 | 0.831 |
| DAG38_4     | 0.99 (0.88, 1.11) | 0.827 | 0.916 | 0.92 (0.82, 1.05) | 0.221 | 0.711 |
| TAG52_7     | 0.99 (0.88, 1.11) | 0.847 | 0.919 | 0.96 (0.85, 1.09) | 0.53  | 0.909 |
| LPE18:1     | 0.99 (0.89, 1.1)  | 0.848 | 0.919 | 1.05 (0.92, 1.19) | 0.449 | 0.873 |
| MAG18:0     | 0.99 (0.85, 1.14) | 0.849 | 0.919 | 0.92 (0.79, 1.09) | 0.367 | 0.831 |
| TAG58_10    | 1.01 (0.9, 1.13)  | 0.85  | 0.919 | 1.02 (0.91, 1.15) | 0.754 | 0.944 |
| PC-PLG34_5  | 1.01 (0.91, 1.13) | 0.851 | 0.919 | 1.02 (0.9, 1.14)  | 0.791 | 0.944 |
| PE-PLG38_3  | 0.99 (0.89, 1.11) | 0.877 | 0.942 | 1.03 (0.92, 1.16) | 0.619 | 0.928 |
| TAG55_2     | 1.01 (0.9, 1.13)  | 0.888 | 0.95  | 0.94 (0.83, 1.07) | 0.339 | 0.804 |
| TAG56_6     | 0.99 (0.88, 1.12) | 0.901 | 0.958 | 0.96 (0.85, 1.09) | 0.552 | 0.918 |
| CE14:0      | 1.01 (0.91, 1.12) | 0.907 | 0.958 | 0.99 (0.88, 1.12) | 0.929 | 0.983 |
| PC30_1      | 1.01 (0.9, 1.12)  | 0.911 | 0.958 | 0.93 (0.82, 1.06) | 0.293 | 0.771 |
| TAG45_0     | 1.01 (0.9, 1.13)  | 0.914 | 0.958 | 0.95 (0.84, 1.09) | 0.467 | 0.873 |
| TAG53_2     | 0.99 (0.89, 1.11) | 0.92  | 0.958 | 0.93 (0.82, 1.06) | 0.314 | 0.804 |
| PC-PLG38_4  | 0.99 (0.89, 1.11) | 0.922 | 0.958 | 0.99 (0.88, 1.12) | 0.907 | 0.979 |
| PE38_5      | 1.01 (0.89, 1.13) | 0.928 | 0.959 | 1.02 (0.9, 1.16)  | 0.78  | 0.944 |
| PE-PLG36_2  | 1 (0.9, 1.12)     | 0.936 | 0.959 | 1.05 (0.92, 1.19) | 0.478 | 0.873 |
| PS40_6      | 1 (0.89, 1.12)    | 0.937 | 0.959 | 0.98 (0.86, 1.12) | 0.742 | 0.937 |
| PC34_3      | 1 (0.89, 1.13)    | 0.949 | 0.962 | 1.01 (0.88, 1.15) | 0.906 | 0.979 |
| TAG56_1     | 1 (0.9, 1.12)     | 0.949 | 0.962 | 0.92 (0.81, 1.04) | 0.201 | 0.668 |

|         |                |       |       |                   |       |       |
|---------|----------------|-------|-------|-------------------|-------|-------|
| SM22:1  | 1 (0.88, 1.14) | 0.983 | 0.989 | 1.15 (0.97, 1.35) | 0.101 | 0.476 |
| CE22:4  | 1 (0.89, 1.12) | 0.984 | 0.989 | 1.07 (0.95, 1.21) | 0.244 | 0.733 |
| CER24:1 | 1 (0.89, 1.12) | 0.99  | 0.99  | 1.06 (0.94, 1.21) | 0.322 | 0.804 |

The relative risks (RRs) correspond to OR from a conditional logistic regression model. FDR: false

discovery rate-controlled p-value.

M1: controlled for age, sex, and study center (if applicable).

M2: additionally adjusted for T2D- and hypertension prevalence, BMI, smoking status, educational attainment, family history of early CAD, and intervention group.

Online Table III: Single lipid-HF associations for all lipids that were nominally significantly associated with HF risk in PREDIMED and available in EPIC-Potsdam

| Model                                                                                                  | PREDIMED |                   |          | EPIC-Potsdam   |                   |         |        |
|--------------------------------------------------------------------------------------------------------|----------|-------------------|----------|----------------|-------------------|---------|--------|
|                                                                                                        | Lipid    | RR (95% CI)*      | p-value† | Matched lipid‡ | RR (95% CI)       | p-value | FDR#   |
| Significant in PREDIMED, replicated in EPIC-Potsdam & robust against adjustment for other risk factors |          |                   |          |                |                   |         |        |
| M1                                                                                                     | PC32_0   | 1.21 (1.07, 1.36) | 0.00180  | PC 16:0/16:0   | 1.49 (1.19, 1.86) | 0.00024 | 0.0018 |
| M2                                                                                                     |          | 1.23 (1.08, 1.41) | 0.00224  |                | 1.43 (1.14, 1.80) | 0.00101 | 0.0076 |
| M1                                                                                                     | CER16:0  | 1.20 (1.07, 1.34) | 0.00226  | CER 16:0       | 1.60 (1.29, 1.99) | 1.2E-05 | 0.0002 |
| M2                                                                                                     |          | 1.28 (1.13, 1.47) | 0.00017  |                | 1.48 (1.17, 1.87) | 0.00048 | 0.0072 |
| Significant in PREDIMED, replicated in EPIC-Potsdam, but NOT robust against further adjustment         |          |                   |          |                |                   |         |        |
| M1                                                                                                     | DAG34_2  | 1.16 (1.04, 1.31) | 0.009    | DAG16:1/18:1   | 1.24 (0.99, 1.54) | 0.029   | 0.062  |
| M2                                                                                                     |          | 1.05 (0.93, 1.20) | 0.42     |                | 1.12 (0.88, 1.42) | 0.177   | 0.332  |
| M1                                                                                                     | TAG51_1  | 1.15 (1.03, 1.29) | 0.012    | TAG51_1-fa16:0 | 1.32 (1.06, 1.64) | 0.006   | 0.018  |
| M2                                                                                                     |          | 1.03 (0.90, 1.17) | 0.671    |                | 1.21 (0.95, 1.53) | 0.058   | 0.174  |
| M1                                                                                                     | TAG50_0  | 1.13 (1.01, 1.26) | 0.026    | TAG50_0-fa16:0 | 1.33 (1.06, 1.65) | 0.006   | 0.018  |
| M2                                                                                                     |          | 1.01 (0.89, 1.15) | 0.839    |                | 1.20 (0.94, 1.52) | 0.075   | 0.188  |

|                                                     |         |                   |        |                |                   |       |       |
|-----------------------------------------------------|---------|-------------------|--------|----------------|-------------------|-------|-------|
| M1                                                  | PE34_2  | 1.13 (1.01, 1.27) | 0.031  | PE18:1/16:1    | 1.26 (1.02, 1.56) | 0.015 | 0.038 |
| M2                                                  |         | 1.07 (0.95, 1.22) | 0.261  |                | 1.20 (0.97, 1.49) | 0.048 | 0.174 |
| M1                                                  | DAG34_1 | 1.13 (1.00, 1.26) | 0.041  | DAG16:1/18:0   | 1.35 (1.08, 1.68) | 0.004 | 0.018 |
| M2                                                  |         | 1.01 (0.89, 1.15) | 0.89   |                | 1.25 (0.99, 1.58) | 0.031 | 0.155 |
| M1                                                  | TAG52_4 | 1.12 (1.00, 1.25) | 0.046  | TAG52_4-fa22:1 | 1.21 (0.98, 1.51) | 0.041 | 0.077 |
| M2                                                  |         | 1.09 (0.97, 1.23) | 0.164  |                | 1.13 (0.91, 1.42) | 0.137 | 0.294 |
| Significant association in PREDIMED, NOT replicated |         |                   |        |                |                   |       |       |
| M1                                                  | PI38_4  | 0.82 (0.73, 0.93) | 0.001  | PI18:0/20:4    | 1.08 (0.88, 1.33) | d.i.  | 1     |
| M2                                                  |         | 0.79 (0.68, 0.91) | 0.001  |                | 1.02 (0.83, 1.27) | d.i.  | 1     |
| M1                                                  | DAG34_0 | 0.84 (0.73, 0.95) | 0.007  | DAG14:0/20:0   | 1.07 (0.87, 1.33) | d.i.  | 1     |
| M2                                                  |         | 0.76 (0.65, 0.88) | <0.001 |                | 1.00 (0.80, 1.24) | d.i.  | 1     |
| M1                                                  | DAG34_3 | 1.15 (1.03, 1.30) | 0.017  | DAG16:0/18:3   | 1.19 (0.96, 1.48) | 0.059 | 0.098 |
| M2                                                  |         | 1.04 (0.91, 1.19) | 0.52   |                | 1.10 (0.87, 1.41) | 0.211 | 0.352 |
| M1                                                  | PC40_6  | 0.87 (0.78, 0.98) | 0.02   | PC18:1/22:5    | 1.12 (0.90, 1.38) | d.i.  | 1     |
| M2                                                  |         | 0.90 (0.78, 1.02) | 0.09   |                | 1.10 (0.89, 1.38) | d.i.  | 1     |
| M1                                                  | CE22:5  | 0.88 (0.79, 0.98) | 0.023  | CE22:5         | 1.07 (0.86, 1.33) | d.i.  | 1     |
|                                                     |         | 0.98 (0.87, 1.11) | 0.79   |                | 1.06 (0.85, 1.33) | d.i.  | 1     |

|    |         |                   |       |                |                   |       |       |
|----|---------|-------------------|-------|----------------|-------------------|-------|-------|
| M1 | DAG36_4 | 1.13 (1.00, 1.26) | 0.043 | DAG16:0/20:4   | 1.15 (0.92, 1.43) | 0.106 | 0.159 |
| M2 |         | 1.11 (0.98, 1.25) | 0.118 |                | 1.04 (0.81, 1.33) | 0.382 | 0.573 |
| M1 | TAG54_3 | 0.90 (0.80, 1.00) | 0.047 | TAG53_4-fa18:0 | 1.31 (1.05, 1.63) | d.i.  | 1     |
| M2 |         | 0.90 (0.80, 1.02) | 0.091 |                | 1.20 (0.95, 1.52) | d.i.  | 1     |

Heart failure risk associations of the 15 of 26 marginally significant ( $p$ -value $<0.05$ ) lipids in PREDIMED, which were available for replication in EPIC-Potsdam.

\*In PREDIMED, the relative risk (RR) correspond to OR from a conditional logistic regression model.

†Two-tailed  $p$ -value in PREDIMED.

‡For isomeric lipids with multiple matches in EPIC-Potsdam, the best predictor among these lipids was selected according the lowest  $p$ -value (backwards selection).

§In EPIC-Potsdam, RRs correspond to hazard ratios from a Cox model.

||One-tailed  $p$ -value in EPIC-Potsdam (testing for directionally consistent estimates only).

\*FDR: false discovery rate, controlled for the 15 intended replications (for M1 and M2 separately).

d.i.: directionally inconsistent risk estimate, one-tailed  $p$ -value not meaningful.

M1: controlled for age, sex, and study center (if applicable).

M2: additionally adjusted for T2D- and hypertension prevalence, BMI, smoking status, educational attainment, family history of early CAD, and intervention group (if applicable).

Online Table IV: Single lipid-HF associations: additional adjustment for standard blood lipid markers

| PREDIMED |                   |         | EPIC-Potsdam  |                   |         |
|----------|-------------------|---------|---------------|-------------------|---------|
| Lipid    | RR (95% CI)*      | p-value | Matched lipid | RR (95% CI)†      | p-value |
| PC 32_0  | 1.23 (1.07, 1.41) | 0.003   | PC 16:0/16:0  | 1.45 (1.13, 1.88) | 0.004   |
| CER 16:0 | 1.28 (1.13, 1.46) | <0.001  | CER 16:0      | 1.57 (1.17,2.09)  | 0.002   |

The association with the relative risk (RR) of heart failure was controlled for age, sex, study center (PREDIMED only), T2D- and hypertension prevalence, BMI, smoking status, educational attainment, family history of early CAD, and intervention group, AND standard blood lipid markers (prevalence of dyslipidemia in PREDIMED and plasma concentrations of HDL-cholesterol, total cholesterol and total triglycerides in EPIC-Potsdam).

Online Table V: Lipid clusters and heart failure incidence

| Model                    | PREDIMED |                   |          | EPIC-Potsdam   |                   |         |
|--------------------------|----------|-------------------|----------|----------------|-------------------|---------|
|                          | Lipid    | RR (95% CI)*      | p-value† | Matched lipid‡ | RR (95% CI)§      | p-value |
| Cluster 1: MAGs & EA16:1 |          |                   |          |                |                   |         |
| M1                       | EA16:1   | 1.27 (1.09, 1.47) | 0.002    |                |                   |         |
| M2                       |          | 1.24 (1.06, 1.46) | 0.008    |                |                   |         |
| M1                       | MAG16:1  | 0.8 (0.67, 0.95)  | 0.010    | MAG16:1        | 1.09 (0.87, 1.37) | d.i.    |
| M2                       |          | 0.74 (0.62, 0.89) | 0.002    |                | 1.05 (0.83, 1.33) | d.i.    |
| Cluster 2: Sphingolipids |          |                   |          |                |                   |         |
| M1                       | CER16:0  | 1.24 (1.06, 1.46) | 0.008    | CER16:0        | 1.81 (1.24, 2.63) | 0.001   |
| M2                       |          | 1.27 (1.06, 1.51) | 0.009    |                | 1.72 (1.14, 2.6)  | 0.005   |
| M1                       | CER24:1  | 0.81 (0.7, 0.94)  | 0.006    | CER24:1        | 0.92 (0.63, 1.35) | 0.337   |
| M2                       |          | 0.86 (0.73, 1)    | 0.048    |                | 0.92 (0.62, 1.38) | 0.345   |
| M1                       | SM16:1   | 2.02 (1.47, 2.76) | <0.001   |                |                   |         |
| M2                       |          | 1.85 (1.32, 2.6)  | <0.001   |                |                   |         |
| M1                       | SM18:0   | 1.61 (1.16, 2.24) | 0.005    | SM18:0         | 1.71 (0.93, 3.16) | 0.043   |
| M2                       |          | 1.43 (1.01, 2.02) | 0.042    |                | 1.54 (0.82, 2.9)  | 0.091   |
| M1                       | SM18:1   | 0.57 (0.39, 0.85) | 0.006    | SM18:1         | 0.53 (0.3, 0.96)  | 0.017   |
| M2                       |          | 0.66 (0.43, 1.02) | 0.059    |                | 0.63 (0.34, 1.15) | 0.066   |
| M1                       | SM24:0   | 0.69 (0.58, 0.83) | <0.001   | SM24:0         | 1.16 (0.81, 1.67) | d.i.    |
| M2                       |          | 0.7 (0.57, 0.85)  | <0.001   |                | 1.27 (0.88, 1.83) | d.i.    |
| M1                       | SM24:1   | 0.75 (0.61, 0.92) | 0.005    | SM24:1         | 0.8 (0.53, 1.21)  | 0.147   |
| M2                       |          | 0.88 (0.71, 1.09) | 0.234    |                | 0.68 (0.44, 1.04) | 0.037   |

Cluster 3: Ic-SFA PCs



|    |        |                   |        |             |                   |       |
|----|--------|-------------------|--------|-------------|-------------------|-------|
| M1 | PC32_0 | 1.27 (1.12, 1.45) | <0.001 | PC16:0/16:0 | 1.31 (0.99, 1.73) | 0.030 |
|----|--------|-------------------|--------|-------------|-------------------|-------|

|    |  |                   |       |  |                   |       |
|----|--|-------------------|-------|--|-------------------|-------|
| M2 |  | 1.25 (1.08, 1.44) | 0.002 |  | 1.34 (1.01, 1.79) | 0.022 |
|----|--|-------------------|-------|--|-------------------|-------|

|    |        |                   |       |             |                   |      |
|----|--------|-------------------|-------|-------------|-------------------|------|
| M1 | PC36_0 | 0.88 (0.77, 0.99) | 0.032 | PC18:0/18:0 | 1.23 (0.95, 1.61) | d.i. |
|----|--------|-------------------|-------|-------------|-------------------|------|

|    |  |                   |       |  |                   |      |
|----|--|-------------------|-------|--|-------------------|------|
| M2 |  | 0.96 (0.84, 1.11) | 0.600 |  | 1.11 (0.84, 1.47) | d.i. |
|----|--|-------------------|-------|--|-------------------|------|

#### Cluster 4: Phospholipids

|    |         |                   |       |         |                   |      |
|----|---------|-------------------|-------|---------|-------------------|------|
| M1 | LPC16:1 | 1.24 (1.07, 1.44) | 0.004 | LPC16:1 | 0.71 (0.51, 0.98) | d.i. |
|----|---------|-------------------|-------|---------|-------------------|------|

|    |  |                   |       |  |                   |      |
|----|--|-------------------|-------|--|-------------------|------|
| M2 |  | 1.32 (1.11, 1.56) | 0.002 |  | 0.75 (0.53, 1.05) | d.i. |
|----|--|-------------------|-------|--|-------------------|------|

|    |        |                   |        |             |                   |       |
|----|--------|-------------------|--------|-------------|-------------------|-------|
| M1 | PC30_1 | 0.68 (0.56, 0.81) | <0.001 | PC14:0/16:1 | 0.96 (0.71, 1.31) | 0.402 |
|----|--------|-------------------|--------|-------------|-------------------|-------|

|    |  |                   |        |  |                   |       |
|----|--|-------------------|--------|--|-------------------|-------|
| M2 |  | 0.66 (0.53, 0.81) | <0.001 |  | 0.89 (0.65, 1.22) | 0.241 |
|----|--|-------------------|--------|--|-------------------|-------|

|    |        |                |        |             |                   |         |
|----|--------|----------------|--------|-------------|-------------------|---------|
| M1 | PC34_2 | 1.66 (1.38, 2) | <0.001 | PC18:1/16:1 | 1.82 (1.25, 2.63) | 0.00097 |
|----|--------|----------------|--------|-------------|-------------------|---------|

|    |  |                   |        |  |                   |         |
|----|--|-------------------|--------|--|-------------------|---------|
| M2 |  | 1.54 (1.25, 1.89) | <0.001 |  | 1.82 (1.24, 2.67) | 0.00141 |
|----|--|-------------------|--------|--|-------------------|---------|

|    |        |                   |        |             |                   |      |
|----|--------|-------------------|--------|-------------|-------------------|------|
| M1 | PE36_0 | 1.73 (1.38, 2.16) | <0.001 | PE18:0/18:0 | 0.95 (0.73, 1.24) | d.i. |
|----|--------|-------------------|--------|-------------|-------------------|------|

|    |  |                   |        |  |                   |      |
|----|--|-------------------|--------|--|-------------------|------|
| M2 |  | 1.51 (1.19, 1.92) | <0.001 |  | 0.95 (0.73, 1.24) | d.i. |
|----|--|-------------------|--------|--|-------------------|------|

|    |        |                   |        |             |                   |      |
|----|--------|-------------------|--------|-------------|-------------------|------|
| M1 | PE38_2 | 0.57 (0.45, 0.72) | <0.001 | PE18:0/20:2 | 1.07 (0.83, 1.39) | d.i. |
|----|--------|-------------------|--------|-------------|-------------------|------|

|    |  |                 |       |  |                   |      |
|----|--|-----------------|-------|--|-------------------|------|
| M2 |  | 0.7 (0.54, 0.9) | 0.006 |  | 1.04 (0.79, 1.35) | d.i. |
|----|--|-----------------|-------|--|-------------------|------|

|    |        |                   |        |             |                   |       |
|----|--------|-------------------|--------|-------------|-------------------|-------|
| M1 | PI38_4 | 0.78 (0.68, 0.88) | <0.001 | PI18:0/20:4 | 0.96 (0.76, 1.21) | 0.371 |
|----|--------|-------------------|--------|-------------|-------------------|-------|

|    |  |                   |        |  |                   |       |
|----|--|-------------------|--------|--|-------------------|-------|
| M2 |  | 0.75 (0.64, 0.87) | <0.001 |  | 0.92 (0.72, 1.17) | 0.242 |
|----|--|-------------------|--------|--|-------------------|-------|

#### Cluster 5: SFA-DAGs

|    |         |                   |       |  |  |  |
|----|---------|-------------------|-------|--|--|--|
| M1 | DAG36_0 | 0.83 (0.73, 0.94) | 0.004 |  |  |  |
|----|---------|-------------------|-------|--|--|--|

|    |  |                   |       |  |  |  |
|----|--|-------------------|-------|--|--|--|
| M2 |  | 0.81 (0.71, 0.93) | 0.003 |  |  |  |
|----|--|-------------------|-------|--|--|--|

#### Cluster 6: Plasmalogens

|    |            |                   |       |  |  |  |
|----|------------|-------------------|-------|--|--|--|
| M1 | PC-PLG36_2 | 0.79 (0.68, 0.91) | 0.002 |  |  |  |
|----|------------|-------------------|-------|--|--|--|

|    |  |                  |       |  |  |  |
|----|--|------------------|-------|--|--|--|
| M2 |  | 0.9 (0.76, 1.06) | 0.202 |  |  |  |
|----|--|------------------|-------|--|--|--|

|    |            |                   |        |  |  |  |
|----|------------|-------------------|--------|--|--|--|
| M1 | PE-PLG34_3 | 1.28 (1.11, 1.49) | <0.001 |  |  |  |
|----|------------|-------------------|--------|--|--|--|

|                                |             |                   |        |                 |                   |          |
|--------------------------------|-------------|-------------------|--------|-----------------|-------------------|----------|
| M2                             |             | 1.2 (1.01, 1.41)  | 0.036  |                 |                   |          |
| M1                             | PE-PLG36_1  | 1.16 (1.03, 1.32) | 0.018  | PE-PLG18:0/18:1 | 1.48 (1.17, 1.86) | 0.00052  |
| M2                             |             | 1.12 (0.98, 1.28) | 0.089  |                 | 1.39 (1.1, 1.76)  | 0.00336  |
| M1                             | PE-PLG40_7  | 0.65 (0.51, 0.82) | <0.001 | PE-PLG18:1/22:6 | 0.76 (0.6, 0.97)  | 0.01178  |
| M2                             |             | 0.68 (0.53, 0.87) | 0.002  |                 | 0.79 (0.62, 1)    | 0.02319  |
| M1                             | PE-PLG42_11 | 1.33 (1.07, 1.67) | 0.011  |                 |                   |          |
| M2                             |             | 1.36 (1.07, 1.72) | 0.011  |                 |                   |          |
| Cluster 7: Unsaturated FA-DAGs |             |                   |        |                 |                   |          |
| M1                             | DAG34_1     | 1.63 (1.3, 2.03)  | <0.001 | DAG16:1/18:0    | 1.45 (1.02, 2.06) | 0.020    |
| M2                             |             | 1.31 (1.03, 1.67) | 0.028  |                 | 1.35 (0.94, 1.93) | 0.050    |
| M1                             | DAG36_2     | 0.65 (0.53, 0.81) | <0.001 | DAG18:0/18:2    | 0.92 (0.65, 1.29) | 0.306    |
| M2                             |             | 0.74 (0.59, 0.93) | 0.011  |                 | 0.91 (0.64, 1.28) | 0.289    |
| Cluster 8: TAGs                |             |                   |        |                 |                   |          |
| M1                             | TAG55_2     | 1.16 (1, 1.34)    | 0.049  | TAG55_2-fa18:1  | 1.42 (0.99, 2.03) | 0.029    |
| M2                             |             | 1.13 (0.96, 1.33) | 0.132  |                 | 1.43 (0.95, 2.17) | 0.044    |
| M1                             | TAG56_5     | 1.26 (1.09, 1.45) | 0.002  | TAG56_5-fa16:0  | 3.06 (1.69, 5.55) | 0.00011  |
| M2                             |             | 1.2 (1.03, 1.41)  | 0.022  |                 | 2.6 (1.41, 4.78)  | 0.00107  |
| M1                             | TAG58_7     | 0.55 (0.4, 0.76)  | <0.001 | TAG58_7-fa16:0  | 0.38 (0.23, 0.63) | 8.40E-05 |
| M2                             |             | 0.49 (0.35, 0.7)  | <0.001 |                 | 0.38 (0.23, 0.65) | 0.00017  |
| M1                             | TAG58_9     | 1.44 (1.09, 1.89) | 0.009  | TAG58_9-fa22:5  | 0.7 (0.51, 0.97)  | d.i.     |
| M2                             |             | 1.69 (1.23, 2.32) | 0.001  |                 | 0.76 (0.55, 1.06) | d.i.     |

\*PREDIMED: relative risks (RRs) based on OR from a conditional logistic regression model.

†Two-tailed p-value in PREDIMED.

‡For isomeric lipids with multiple matches in EPIC-Potsdam, the best predictor among these lipids was

selected according the lowest p-value.

§In EPIC-Potsdam, RRs correspond to HRs from a Cox model.

||One-tailed p-value.

# d.i., directionally inconsistent

M1: controlled for age, sex, and study center (if applicable).

M2: additionally adjusted for T2D- and hypertension prevalence, BMI, smoking status, educational attainment, family history of early CAD, and intervention group (if applicable).

Online Table VI: Replication with the sum of all isomeric lipids in EPIC-Potsdam that match a PREDIMED-hit

| EPIC-Potsdam                                                  |       |                   |         |
|---------------------------------------------------------------|-------|-------------------|---------|
| SUM of ALL MATCHES                                            | Model | RR                | p-value |
| Replicated & robust against adjustment for other risk factors |       |                   |         |
| PC 32_0                                                       | M1    | 1.46 (1.18, 1.8)  | 0.00033 |
|                                                               | M2    | 1.41 (1.14, 1.74) | 0.00140 |
| Replicated, but NOT robust against further adjustment         |       |                   |         |
| DAG 34_2                                                      | M1    | 1.23 (0.99, 1.53) | 0.0331  |
|                                                               | M2    | 1.12 (0.88, 1.43) | 0.1701  |
| TAG 51_1                                                      | M1    | 1.3 (1.05, 1.61)  | 0.0085  |
|                                                               | M2    | 1.19 (0.94, 1.5)  | 0.0715  |
| TAG 50_0                                                      | M1    | 1.32 (1.06, 1.64) | 0.0065  |
|                                                               | M2    | 1.19 (0.94, 1.52) | 0.0731  |
| PE 34_2                                                       | M1    | 1.29 (1.05, 1.59) | 0.0077  |
|                                                               | M2    | 1.2 (0.97, 1.49)  | 0.0483  |
| DAG 34_1                                                      | M1    | 1.32 (1.06, 1.65) | 0.0063  |
|                                                               | M2    | 1.21 (0.96, 1.54) | 0.0554  |
| TAG 52_4                                                      | M1    | 1.2 (0.97, 1.49)  | 0.0478  |
|                                                               | M2    | 1.12 (0.89, 1.4)  | 0.1742  |
| NOT replicated                                                |       |                   |         |
| PI 38_4                                                       | M1    | 1.12 (0.91, 1.38) | 0.1382  |
|                                                               | M2    | 1.07 (0.86, 1.32) | 0.2688  |

|          |    |                   |        |
|----------|----|-------------------|--------|
| DAG 34_0 | M1 | 1.19 (0.96, 1.48) | 0.0546 |
|          | M2 | 1.08 (0.86, 1.36) | 0.2509 |
| DAG 34_3 | M1 | 1.19 (0.96, 1.48) | 0.0593 |
|          | M2 | 1.1 (0.87, 1.4)   | 0.2139 |
| PC 40_6  | M1 | 1.05 (0.85, 1.31) | 0.3228 |
|          | M2 | 1.01 (0.82, 1.25) | 0.4524 |
| DAG 36_4 | M1 | 1.15 (0.92, 1.43) | 0.1062 |
|          | M2 | 1.04 (0.81, 1.33) | 0.3821 |
| TAG 54_3 | M1 | 1.33 (1.08, 1.65) | 0.0088 |
|          | M2 | 1.23 (0.97, 1.55) | 0.086  |

M1: controlled for age, sex

M2: additionally adjusted for T2D- and hypertension prevalence, BMI, smoking status, educational attainment, family history of early CAD, and intervention group

For isomeric lipids with multiple matches in EPIC-Potsdam, the absolute concentrations of all lipids were summed. For each constructed summary-measure, the matched lipids that were summed in EPIC-Potsdam are listed below:

PC 32\_0: PC 18:0/14:0+PC 16:0/16:0

DAG 34\_2: DAG 16:0/18:2+DAG 16:1/18:1

TAG 51\_1: TAG 51\_1-fa15:0+TAG 51\_1-fa16:0+TAG 51\_1-fa17:0+TAG 51\_1-fa18:0+TAG 51\_1-fa18:1

TAG 50\_0: TAG 50\_0-fa14:0+TAG 50\_0-fa16:0+TAG 50\_0-fa18:0 DAG 34\_0

PE 34\_2: PE 18:1/16:1+PE 16:0/18:2

DAG 34\_1: DAG 16:0/18:1+DAG 16:1/18:0

TAG 52\_4: TAG 52\_4-fa14:0 + TAG 52\_4\_fa16:0 + TAG 52\_4-fa16:1 +TAG 52\_4-fa18:0 + TAG 52\_4\_fa18:1  
+ TAG 52\_4-fa18:2 +TAG 52\_4-fa18:3 + TAG 52\_4-fa20:0 + TAG 52\_4-fa20:2 +TAG 52\_4-fa20:3 + TAG

52\_4-fa20:4 + TAG 52\_4-fa22:1 +TAG 52\_4-fa22:4

PI 38\_4: PI 18:1/20:3+PI 18:0/20:4

DAG 34\_0: DAG 14:0/20:0+DAG 16:0/18:0

DAG 34\_3: DAG 16:0/18:3+DAG 16:1/18:2

PC 40\_6: PC 18:0/22:6+PC 18:1/22:5

DAG 36\_4: DAG 16:0/20:4

TAG 54\_3: TAG54\_3-fa16:0 + TAG54\_3-fa16:1 + TAG54:3-fa18:0 + TAG54\_3-fa18:1 + TAG54\_3-fa18:2 +

TAG54\_3-fa18:3 + TAG54\_3-fa20:1 + TAG54\_3-fa20:2 + TAG54\_3-fa20:3

Online Table VII: Lipid score-HF associations: additional adjustment for standard blood lipid markers

| PREDIMED |                   |         | EPIC-Potsdam  |                   |         |
|----------|-------------------|---------|---------------|-------------------|---------|
| Lipid    | RR (95% CI)       | p-value | Matched lipid | RR (95% CI)       | p-value |
| Score 1  | 2.32 (1.92, 2.80) | <2E-16  |               |                   |         |
| Score 2  | 1.29 (1.13, 1.46) | 0.0001  | Score 2       | 1.49 (1.15, 1.93) | 0.002   |

Controlled for age, sex, study center (PREDIMED only), T2D- and hypertension prevalence, BMI, smoking status, educational attainment, family history of early CAD, and intervention group, AND standard blood lipid markers (prevalence of dyslipidemia in PREDIMED and plasma concentrations of HDL-cholesterol, total cholesterol and total triglycerides in EPIC-Potsdam).

Online Table VIII: Lipid marker-HF associations, stratified by intervention group.

| lipid                      | Intervention group | Model | RR                | P(IA) |
|----------------------------|--------------------|-------|-------------------|-------|
| CER16:0                    | Low-fat (control)  | M1    | 1.14 (0.94, 1.38) | ref.  |
|                            |                    | M2    | 1.17 (0.98, 1.41) |       |
|                            | MedDiet+EVOO       | M1    | 1.19 (0.98, 1.44) | 0.82  |
|                            |                    | M2    | 1.23 (1.01, 1.5)  |       |
|                            | MedDiet+nuts       | M1    | 1.11 (0.92, 1.34) | 0.915 |
|                            |                    | M2    | 1.16 (0.95, 1.42) |       |
| PC32_0                     | Low-fat (control)  | M1    | 1.16 (0.94, 1.43) | ref.  |
|                            |                    | M2    | 1.19 (0.97, 1.47) |       |
|                            | MedDiet+EVOO       | M1    | 1.14 (0.93, 1.41) | 0.626 |
|                            |                    | M2    | 1.1 (0.91, 1.34)  |       |
|                            | MedDiet+nuts       | M1    | 1.22 (0.99, 1.49) | 0.789 |
|                            |                    | M2    | 1.25 (1.02, 1.54) |       |
| Score 1 (cross- validated) | Low-fat (control)  | M1    | 1.68 (1.41, 1.99) | ref.  |
|                            |                    | M2    | 1.62 (1.37, 1.91) |       |
|                            | MedDiet+EVOO       | M1    | 1.72 (1.45, 2.04) | 0.66  |
|                            |                    | M2    | 1.63 (1.37, 1.93) |       |
|                            | MedDiet+nuts       | M1    | 1.52 (1.31, 1.77) | 0.367 |
|                            |                    | M2    | 1.5 (1.27, 1.77)  |       |
| Score 2 (replicated)       | Low-fat (control)  | M1    | 1.19 (0.98, 1.44) | ref.  |
|                            |                    | M2    | 1.13 (0.93, 1.38) |       |
|                            | MedDiet+EVOO       | M1    | 1.29 (1.08, 1.56) | 0.447 |
|                            |                    | M2    | 1.2 (0.99, 1.45)  |       |
|                            | MedDiet+nuts       | M1    | 1.31 (1.09, 1.58) | 0.663 |
|                            |                    | M2    | 1.25 (1.03, 1.52) |       |

Lipid marker-HF risk associations stratified by intervention group. The three long-term intervention diet include: low-fat (control), Mediterranean Diet (MedDiet) enriched with extra-virgin olive oil (+EVOO) or with nuts (+nuts). Unmatched logistic regression models were used to estimate effects of each lipid-exposure in each stratum.

M1 corresponds to the age- and sex-adjusted model.

M2 is adjusted for other HF-risk factors as in the main analyses.

P(IA) is the p-value for the multiplicative interaction term from separate models that contained each lipid as continuous exposure and the MedDiet-groups as dummy-variables, plus interaction terms of the MedDiet-groups with the lipids.





## Online Figures

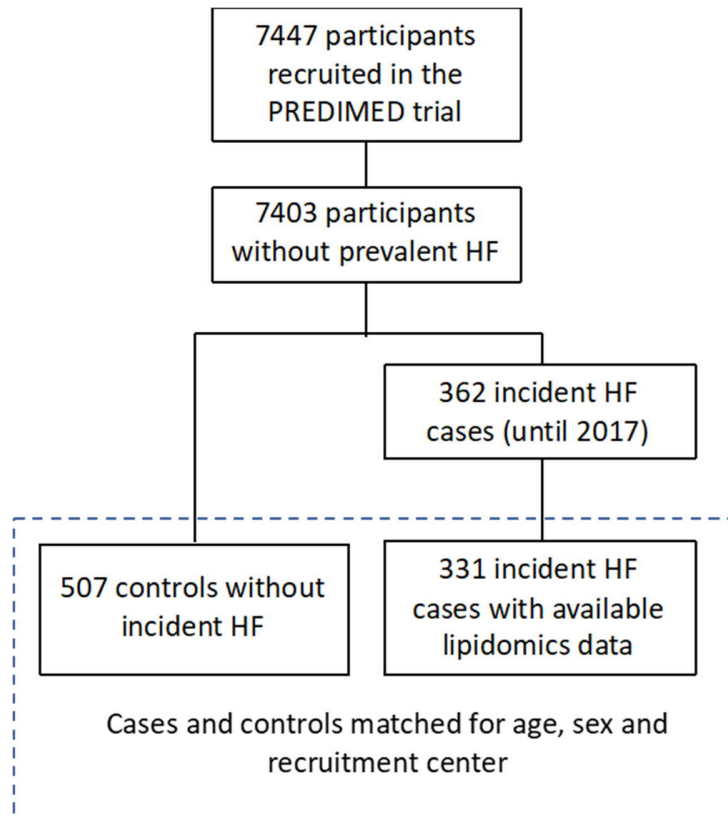

Online Figure I: Case-control design for HF in PREDIMED

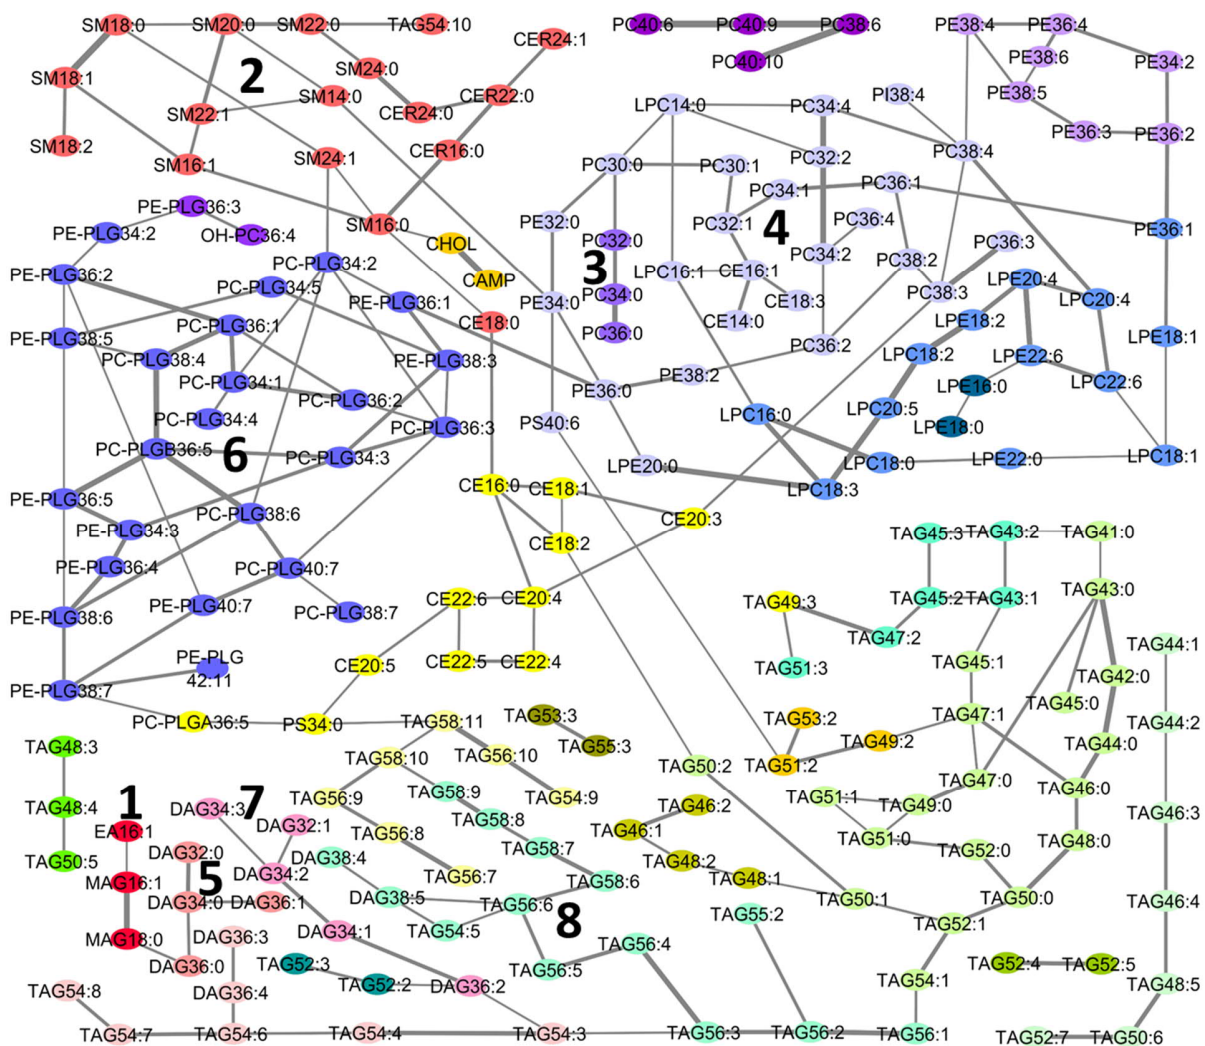

Online Figure II: The robust lipidomics network. Based on the conditional independence structure among the 216 targeted lipids, we constructed a robust data-driven lipid network. Fourteen lipids were not robustly linked to other measured lipid metabolites. The 241 edges connecting the remaining 202 lipids largely reflected plausible biological links. The walktrap-algorithm identified 26 densely connected network-clusters. Colors indicate the network-clusters, identified with the walktrap-algorithm. Numbers correspond to variable importance ranks. They mark the clusters that were selected as containing

important lipids for heart failure prediction, based on joint variable importance of the cluster variables in a random forest model.
